# Supplementary material
Source: HighWire-hosted journal article supplement (https://bmjopen.bmj.com/content/14/1/e074191)
Supplement: inline-supplementary-material-9 [file inline-supplementary-material-9.pdf]

**WHO Global Index Medicus (WPRIM (Western Pacific, LILACS (Americas), IMSEAR (South-East Asia), IMEMR (Eastern Mediterranean), AIM (Africa)) December 1, 2022**

tw:((cancer\* or tumor\* or onco\* or neoplas\* or malignan\* or metast\* or carcino\*) AND (minorit\* or ethnic\* or race or racial\* or immigrant\* or disadvantaged or dis-advantaged or underprivileg\* or under-privileg\* or underrepresent\* or under-represent\* or underresource\* or under-resource\* or vulnerable\*) AND (trial? or investigation\* or research or enrol\* or participat\* or participant\* or recruit\* or refus\* or dropout\* or drop-out\* or retention\* or attrition\*)) AND (la:(“en”))

Results: 619
